# Supplementary material for: Serum Folate Related to Five Measurements of Obesity and High-Sensitivity C-Reactive Protein in Korean Adults
Source: MDPI journal article supplement (doi:10.3390/nu14173461), 2022-08-24
Supplement: s1 [file s1]

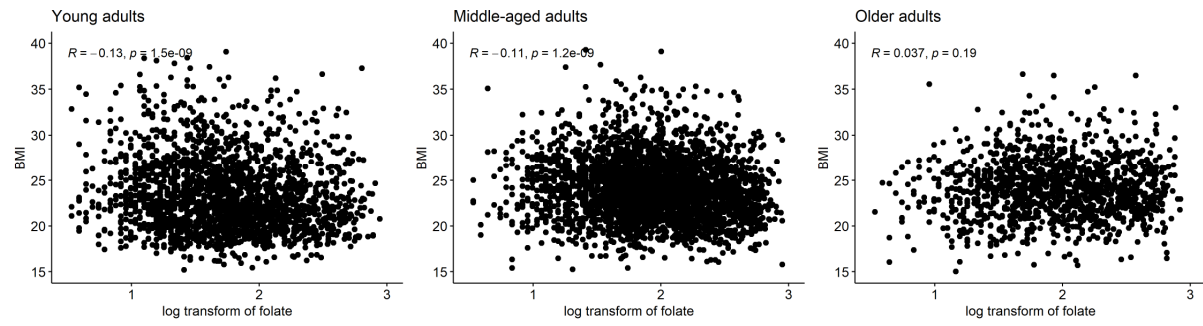

Supplementary Figure S1. The scatter plot between log transform of serum folate and body mass index.
